# Supplementary material
Source: PubMed Central journal article supplement (PMC3127641)
Supplement: supp_10_4_604__1.pdf [file supp_10_4_604__1.pdf]

2  
4  
6  
8  
10  
12  
14  
16  
18  
20  
22  
24  
26  
28  
30  
32  
34  
36  
38  
40  
42  
44  
46  
48  
50  
52  
54  
56  
58  
60  
62  
64  
65  
66  
67  
68  
69  
70  
71  
72  
73  
74  
75

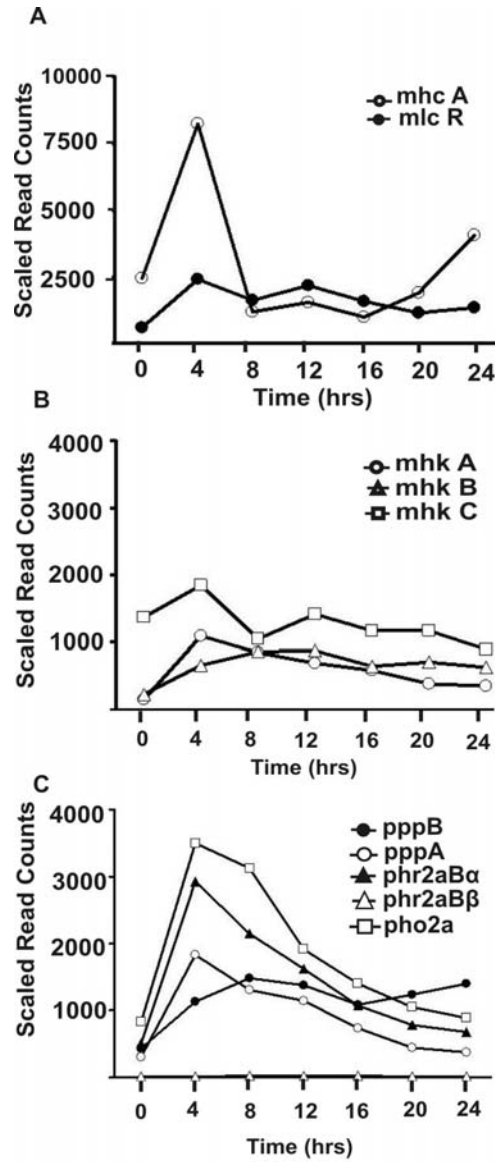

Supplemental Figure 1: RNA expression during the active chemotactic cell migration phase of development. Data was mined using the RNASeq database dictyExpress (at dictybase.org). **(A)**. Expression level of myosin II heavy chain gene mhc A (dictybase gene identifier number DDB\_G0286355) and regulatory light chain mlc R gene (DDB\_G0276077) over 24h of development. **(B)**. Expression level of myosin II heavy chain kinase genes mhk A (DDB\_G0291231), mhk B (DDB\_G0289115), and mhk C (DDB\_G0290687) over 24h of development. **(C)**. Expression level of subunits of PP2A: the core catalytic subunit pho2a (DDB\_G0290263), the core scaffolding subunit pppA (DDB\_G0283601), and the B55-type targeting subunits phr2aB $\alpha$  (DDB\_G0283905) and phr2aB $\beta$  (DDB\_G0293386).

Light Source  
←

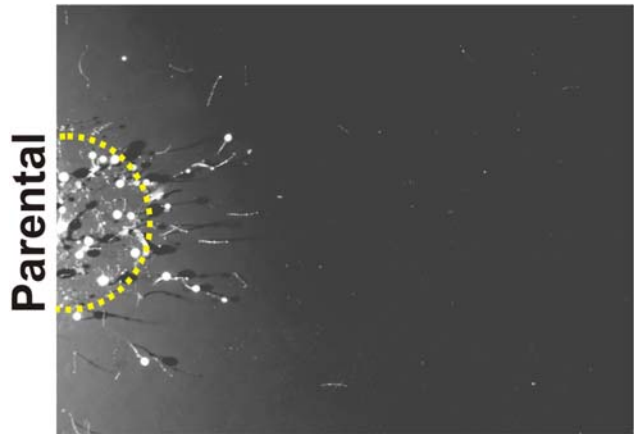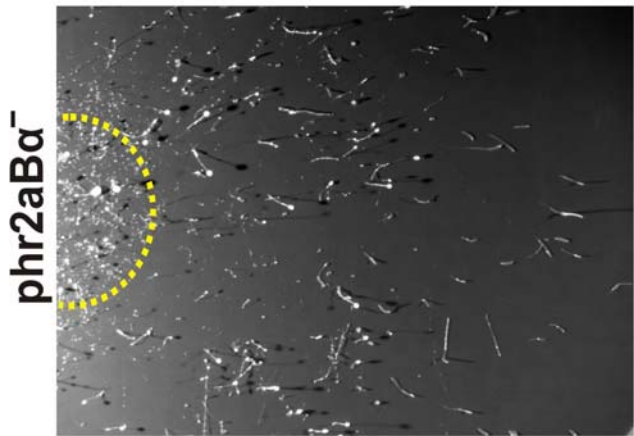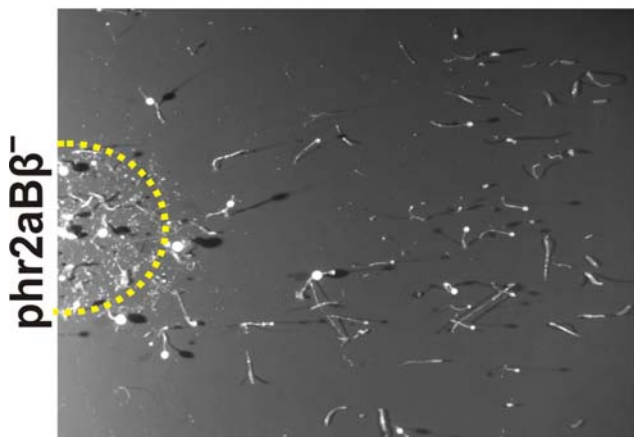

Supplemental Figure 2: phr2aB $\alpha$  and phr2aB $\beta$  null cells display increased slug formation during phototactic migration on buffered-agar plates. Cells were concentrated and spotted on starvation buffer-agar plates and allowed to migrate for 48 hrs towards a pinhole light source. Cells were plated in ~10 mm spot at the left edge of each field of view (yellow dotted line).
